# Supplementary material
Source: Research Square preprint supplement (doi:10.21203/rs.3.rs-9395311/v1)
Supplement: Supplementary file 1 [file a72feec7338bdad481cbf405.docx]

**Supplemental-Table-S1.**

Table.S1 Primer sequences for qRT-PCR.

| Genes | Accession no. | Primer Sequence (5′-3′) | Product size (bp) |
| --- | --- | --- | --- |
| OPG | XM_015283019.4 | F: TGGCTGAACACCCTTGCAGA  R: ACTGTGCCTTTGTTTAATCCG | 81 |
| RUNX2 | XM_015285080.4 | F: ATCCCAGGCAGTTCACAAGC  R: ACATACCCAGTGACATGCCTGA | 123 |
| SP7 | XM_015300329.3 | F: ACCTGAAGGCGCACCTCCGTT  R: ACGTGGCGCTCCAGCTCGTC | 106 |
| ALPL | XM_046903109.1 | F: CCTACGCACACTCAGCCAACCG  R: CGATGTCTTTGCAGCCGCCCTC | 84 |
| COL1A1 | NM_001396622.1 | F: TCTACCCCACGCAAGCCACCA  R: AGCCCTCACCGCCGTACTCA | 129 |
| BMP2 | NM_001398170.1 | F: ATTAGCAGGTCTTTACATCAGG  R: TGACGCTTTTCTCTTTTGTGG | 113 |
| RANKL | XM_046908586.1 | F: AAACCTGACTAAAAGAGGGCTTC  R: AGTATTTGGTGCTTCCTCCCTTC | 104 |
| NFATC1 | XM_015275936.4 | F: ATGGCCTTCAGACATCAAATCCC  R: CGCTGTCAATGTGTCCTCCGTA | 84 |
| ACP5 | XM_046904768.1 | F: TTCGCCCACCTCCGCCTCGAC  R: GCCACGCGGTACAGAACTCTCCC | 80 |
| MMP9 | NM_204667.2 | F: GCGTCTTCCCCTTCATCTTCG  R: AGCCGTATTTCTTGTCCTGGT | 120 |
| RANK | XM_040696633.2 | F: AGCATTTCTCACCCGTACCCA  R: ATCGTTCTCCCCTACCTCCAC | 140 |
| JAM-A | XM_037164140.2 | F: GAAAACCAACCCGTGGACAT  R: GGAAGAGCCCTTCTGGAACTT | 90 |
| ZO-1 | NM_001301025.3 | F: CTTCAGGTGTTTCTCTTCCTCCTC  R: CTGTGGTTTCATGGCTGGATC | 131 |
| OCLN | XM_025144247.2 | F: ATCGTCATCCTGCTCTGCCTCATCT  R: CGTTCTTCACCCACTCCTCCAC | 142 |
| Claudin-1 | NM_001185022.2 | F: CATCATTGCAGGTCTGTCAGC  R: CCGAGCCACTCTGTTGCCAT | 61 |
| IL-1β | XM_015297469.3 | F: GGTCAACATCGCCACCTACA  R: CATACGAGATGGAAACCAGCAA | 86 |
| IL-6 | NM_204628.2 | F: AAATCCCTCCTCGCCAATCT  R: CCCTCACGCTCTTCTCCATAAA | 106 |
| TNF-α | XM_015284186.4 | F: GGACAGCCTATGCCAACAAG  R: ACACGACAGCCAAGTCAACG | 168 |
| CaBP-D28K | NM_205513.2 | F: GTGCAAAAGAGTTCAATAAAGCC  R: AGAGATCCTTCAGTAGTGCAT | 96 |
| NCX1 | NM_001398209.1 | F: GTCTACTGCCACCGTCACC  R: GGGCACAATAACATTTCCTCGT | 148 |
| PMCA1b | NM_001168002.4 | F: AGCTCAAGATGGTGCAGCTA  R: AACAAACCTGCTTTGCCAATCT | 165 |
| Npt2b | NM_204474.3 | F: ACTGGCTTGCTGTGTTTGC  R: AGGGGCATCTTCACCACTTT | 113 |
| VDR | NM_205098.2 | F: CACCGGCTTCCACTTCAACGC  R: AACATCGCTTTCCTCTTCATGCT | 81 |
| β-actin | NM_205518.2 | F: GATATTGCTGCGCTCGTTGT  R: TACCAACCATCACACCCTGAT | 150 |
